# Primate TRIM34 is a broadly-acting, TRIM5-dependent lentiviral restriction factor

Joy Twentyman<sup>1,2</sup>, Anthony Khalifeh<sup>3</sup>, Abby L. Felton<sup>2</sup>, Michael Emerman<sup>2</sup>, Molly OhAinle<sup>2,3\*</sup>

<sup>1</sup> Department of Global Health, University of Washington, Seattle, WA, United States, <sup>2</sup> Divisions of Human Biology and Basic Sciences, Fred Hutch Cancer Center, Seattle, WA, United States, <sup>3</sup> Department of Molecular and Cell Biology, Division of Immunology and Molecular Medicine, University of California –Berkeley, Berkeley, CA, United States

\*Corresponding author, Molly OhAinle, [ohainle@berkeley.edu](mailto:ohainle@berkeley.edu)

## Abstract

Human immunodeficiency virus (HIV) and other lentiviruses adapt to new hosts by evolving to evade host-specific innate immune proteins that differ in sequence and often viral recognition between host species. Understanding how these host antiviral proteins, called restriction factors, constrain lentivirus replication and transmission is key to understanding the emergence of pandemic viruses like HIV-1. Human TRIM34, a paralogue of the well-characterized lentiviral restriction factor TRIM5 $\alpha$ , was previously identified by our lab via CRISPR-Cas9 screening as a restriction factor of certain HIV and SIV capsids. Here, we show that diverse primate TRIM34 orthologues from non-human primates can restrict a range of Simian Immunodeficiency Virus (SIV) capsids including SIV<sub>AGM-SAB</sub>, SIV<sub>AGM-TAN</sub> and SIV<sub>MAC</sub> capsids, which infect sabaues monkeys, tantalus monkeys, and rhesus macaques, respectively. All primate TRIM34 orthologues tested, regardless of species of origin, were able to restrict this same subset of viral capsids. However, in all cases, this restriction also required the presence of TRIM5 $\alpha$ . We demonstrate that TRIM5 $\alpha$  is necessary, but not sufficient, for restriction of these capsids, and that human TRIM5 $\alpha$  functionally interacts with TRIM34 from different species. Finally, we find that both the TRIM5 $\alpha$  SPRY v1 loop and the TRIM34 SPRY domain are essential for TRIM34-mediated restriction. These data support a model in which TRIM34 is a

broadly-conserved primate lentiviral restriction factor that acts in tandem with TRIM5 $\alpha$ , such that together, these proteins can restrict capsids that neither can restrict alone.

## INTRODUCTION

Restriction factors are a class of cell-intrinsic, germline-encoded host immune factors that can inhibit viral infection and replication. The human genome encodes for approximately 70-100 TRIM (Tripartite Motif) proteins, many of which play a role in host defense [1]. The alpha isoform of TRIM5 (TRIM5 $\alpha$ ) in primates is a well-characterized example of a primate restriction factor with activity against retroviruses. The activity of TRIM5 $\alpha$  against a given retrovirus depends on both the species from which the TRIM5 $\alpha$  is derived and the capsid (CA) protein of the retrovirus [2–5]. In the context of HIV-1, TRIM5 $\alpha$  acts directly on CA by multimerizing onto the CA lattice [5,6]. This interaction results in aberrant uncoating of CA, interrupting the viral life cycle [5,7]. TRIM5 $\alpha$  from rhesus macaques and many other Old World monkeys has much greater antiviral activity against HIV-1 than does human TRIM5 $\alpha$  [2,5,8].

TRIM proteins are composed of a common set of N-terminal domains (RING, Bbox, and coiled-coil) followed by one or more variable C-terminal domains [9]. An important characteristic of TRIM5 $\alpha$ , and TRIM proteins more generally, is their ability to oligomerize to form structures with very high binding avidity to CA [7]. Homo-oligomerization of TRIM5 $\alpha$  is essential to its ability to restrict viral CA [10–12]. Furthermore, TRIM proteins have also been demonstrated to hetero-oligomerize with each other [9,13,14].

Previously, our lab performed a CRISPR-Cas9 screen to identify restriction factors against an HIV-1 strain with a mutation in CA, N74D, that renders it more susceptible to CA-mediated restriction factors [15]. We identified TRIM34 as a restriction factor of the HIV-1 N74D capsid mutant as well as select SIV capsids [16]. TRIM34 is a paralogue of TRIM5 $\alpha$ , sharing a common domain architecture, and human TRIM34 and TRIM5 $\alpha$  have approximately 57% amino

acid identity [17]. Moreover, TRIM34-mediated restriction requires TRIM5 $\alpha$ , and TRIM34 and TRIM5 $\alpha$  colocalize with incoming capsids [16].

While TRIM5 $\alpha$  and TRIM34 both can interact with lentiviral CA, TRIM5 $\alpha$ , but not TRIM34, has undergone positive selection [14,18]. A history of positive selection, in which the rate of nonsynonymous mutations exceeds the rate of synonymous mutations, is characteristic of host proteins that are in evolutionary conflict with pathogens and often occurs at sites of direct physical interface between host and pathogen [19,20]. Specifically, the v1 loop of TRIM5 $\alpha$ 's C-terminal SPRY domain has been found to have undergone rapid evolution, and this region is responsible for viral recognition [18]. Conversely, the lack of evidence for positive selection on TRIM34 suggests that TRIM34 may not contain sites of evolutionarily-important direct viral interaction.

Although currently there does not exist evidence of evolutionary conflict within TRIM34, here we show that TRIM34 antiviral activity has been broadly conserved across primate species as an antiviral gene against CA of diverse primate lentiviruses. We find that restriction by TRIM34 from primates requires TRIM5 $\alpha$  and that the TRIM5 $\alpha$  SPRY v1 loop is an essential mediator of restriction. These results suggest that TRIM34 relies on the capsid-binding properties of TRIM5 $\alpha$ . However, as the TRIM34 SPRY domain is also required for restriction, our results suggest that both TRIM34 and TRIM5 $\alpha$  contribute to capsid recognition and/or antiviral function. We propose that TRIM34, which has not undergone positive selection, is an antiviral protein that requires TRIM5 $\alpha$ , which has undergone positive selection.

## RESULTS

### Diverse primate TRIM34 orthologues can act as lentiviral restriction factors

Amino acid variation due to positive selection over evolutionary time in the v1 loop of TRIM5 $\alpha$  confers different primate species with varying specificities towards retroviral capsids [18,21]. Although TRIM34 lacks evidence of positive selection found in TRIM5 $\alpha$ , there is still

diversity across different primate TRIM34 alleles. For example, relative to human TRIM34, chimpanzee, sabaeus monkey, and rhesus macaque orthologues differ by 4, 27, and 26 amino acids, respectively. While we have previously shown that human TRIM34 restricts SIV<sub>AGM-TAN</sub> and SIV<sub>MAC</sub>, here we wished to determine whether amino acid variation in TRIM34 orthologues from divergent primates affects TRIM34's capacity to restrict different primate lentiviral capsids [16]. Specifically, we tested whether a panel of 4 TRIM34 orthologues from diverse primate species comprising human (*Homo sapiens*), chimpanzee (*Pan troglodytes troglodytes*), sabaeus monkey (*Chlorocebus sabaeus*), and rhesus macaque (*Macaca mulatta*) orthologues would restrict a panel of lentiviral capsids (HIV-1, SIV<sub>CPZ</sub>, SIV<sub>AGM-SAB</sub>, SIV<sub>AGM-TAN</sub>, and SIV<sub>MAC</sub>, which arise from humans; chimpanzees; two species of African green monkeys, the sabaeus monkey and the tantalus monkey; and rhesus macaques, respectively).

To test the effects of different primate TRIM34 orthologues in the absence of endogenous TRIM34, we generated a clonal *TRIM34* knockout (KO) line in the human THP-1 cell line. We then introduced primate TRIM34 orthologues using a doxycycline-inducible lentiviral vector to generate human, chimpanzee, sabaeus, and macaque TRIM34 over-expressing cell lines. These orthologues were selected because they represent a broad range of primate TRIM34 from both hominid and Old World monkeys for which we also have the corresponding lentiviral capsids. We tested an empty-vector line as a control for the absence of any TRIM34. We confirmed that expression of each of the TRIM34 orthologues is induced by doxycycline (Figure 1a), although overall steady-state expression levels varied somewhat with the macaque TRIM34 expressed at higher levels and the chimpanzee TRIM34 at lower levels.

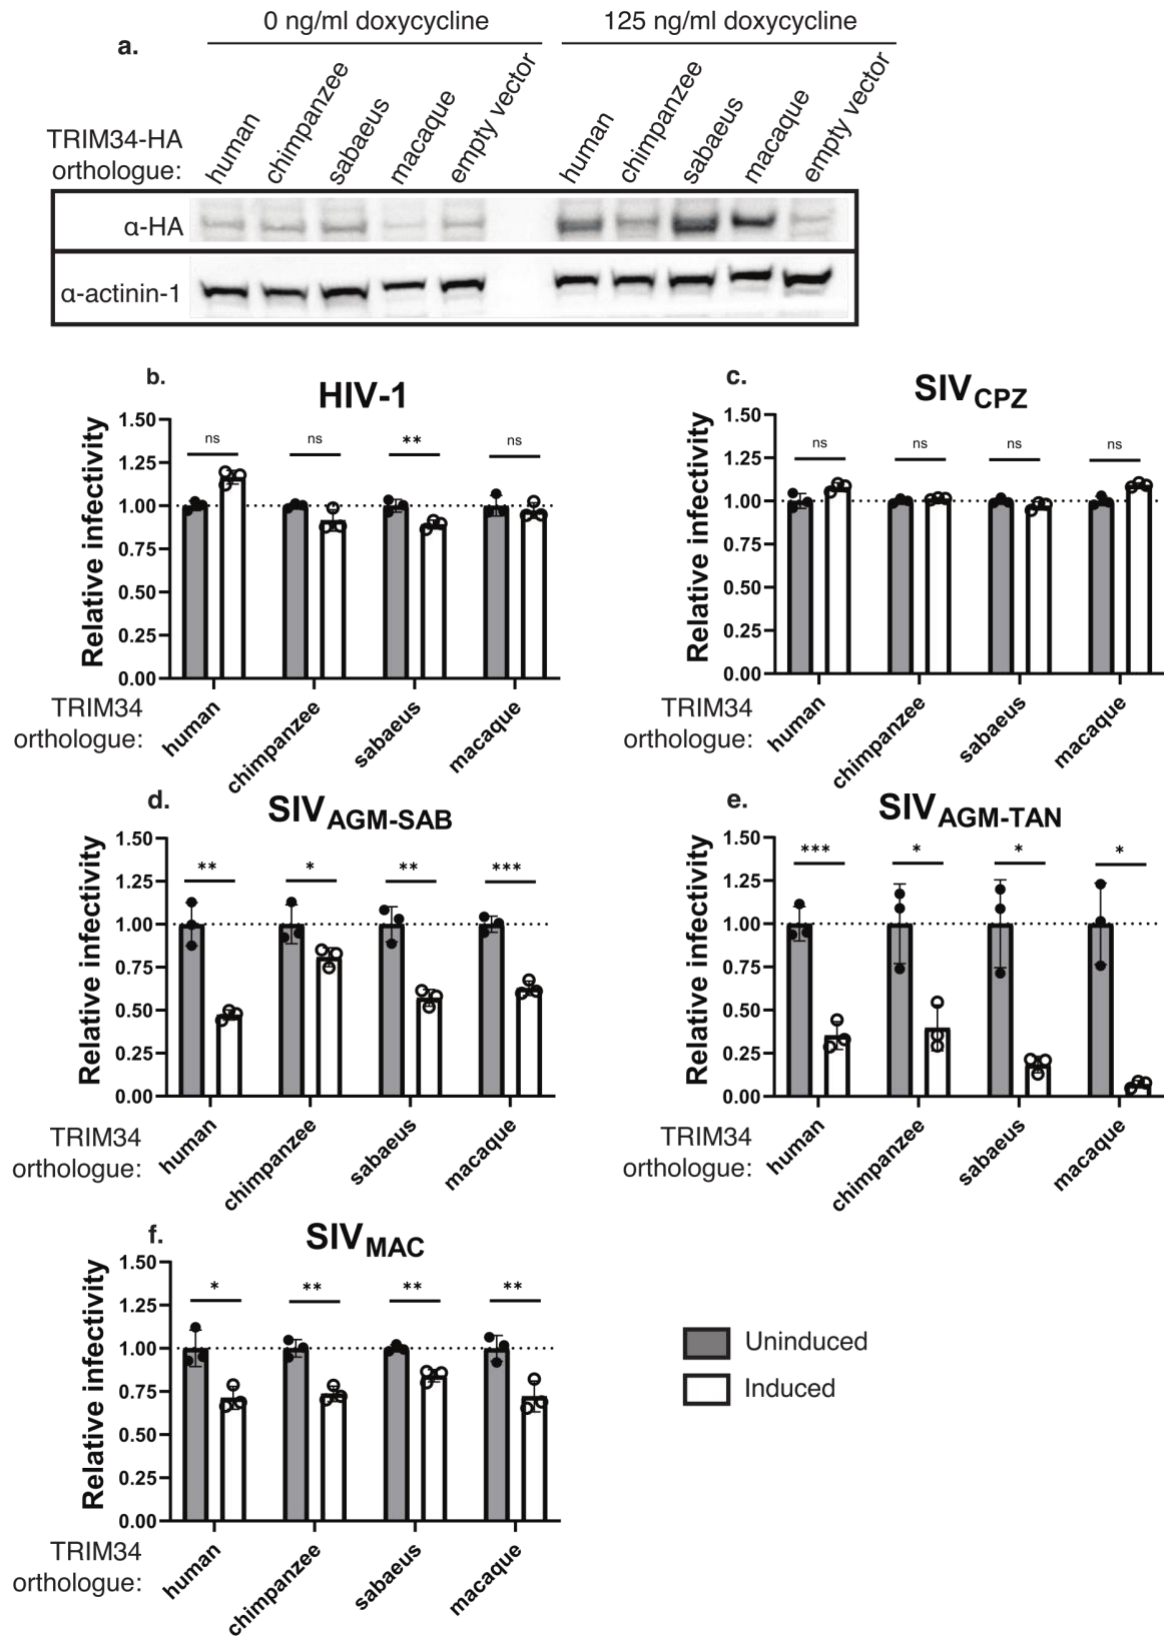

# **Figure 1. Diverse primate TRIM34 orthologues restrict SIV<sub>AGM-SAB</sub>, SIV<sub>AGM-SAB</sub>, and SIV<sub>MAC</sub> capsids in the presence of TRIM5α**

a. THP-1 *TRIM34* clonal KO cells were generated by electroporation of multiplexed sgRNA against *TRIM34* and single cell sorting (ICE KO score = 96%). THP-1 *TRIM34* KO cells were transduced with doxycycline-inducible HA-tagged primate TRIM34 orthologues or empty vector control. Primate TRIM34 expression was induced with doxycycline. Expression levels were visualized by immunoblotting 72 h post-induction.

b-f. Primate TRIM34 expression was induced in THP-1 *TRIM34* clonal KO cells. 1 day post-induction, cells were either challenged with chimeric virus particles containing HIV-1 capsids co-expressing zsGreen (b) or SIV capsids co-expressing eGFP including SIV<sub>CPZ</sub> (c), SIV<sub>AGM-SAB</sub> (d), or SIV<sub>MAC</sub> (f); or challenged with VSV-G pseudotyped SIV<sub>AGM-TAN-luc</sub> (e). Infection was quantified 2 dpi by flow cytometry (b-d, f) or luminometry (e). Relative infectivity in induced cells (white bars) is normalized to average infectivity in uninduced control cells (grey bars). Data are represented as mean  $\pm$  s.d. of 3 technical replicates from 1 representative experiment. One-sided p values were calculated by Welch's *t*-test. ns = nonsignificant, \*  $p \leq 0.05$ , \*\*  $p \leq 0.01$ , \*\*\*  $p \leq 0.001$ , \*\*\*\*  $p \leq 0.0001$ .

We then challenged these cells to infection using a VSV-G pseudotyped lentiviral vector system, in which the CA region of a gag/pol expression construct encoded either HIV-1, SIV<sub>CPZ</sub>, SIV<sub>AGM-SAB</sub>, or SIV<sub>MAC</sub> capsids, whose host species match the species of origin of the TRIM34 orthologues used [22,23]. These virus particles also encoded a fluorescent reporter. We also tested a full-length infectious molecular clone of SIV<sub>AGM-TAN</sub> that encodes a luciferase reporter [24]. After induction with doxycycline or media-only control, infectivity was quantified 2 days post-infection (dpi) by luciferase assay (SIV<sub>AGM-TAN</sub>) or flow cytometry (all others). Of note, we found that while none of the TRIM34 orthologues tested restricted HIV-1 or SIV<sub>CPZ</sub> capsids (Figure 1b-1c), all of these same TRIM34 orthologues restricted SIV<sub>AGM-TAN</sub>, SIV<sub>AGM-SAB</sub>, and SIV<sub>MAC</sub> capsids (Figure 1d-1f). These data suggest that, in contrast to TRIM5α, the antiviral specificity of TRIM34 does not seem to vary across TRIM34 orthologues. Rather, TRIM34 antiviral activity against the same set of lentiviral capsids is a conserved activity of all primate TRIM34 orthologues we tested. Moreover, the antiviral activity of all primate TRIM34s is specific for the same subset of lentiviral capsids. For example neither of the hominid lentiviruses were affected by any TRIM34 orthologue we tested (Figure 1b-c), while the lentiviral capsids that were restricted by human TRIM34—SIV<sub>AGM-TAN</sub>, SIV<sub>AGM-SAB</sub>, and SIV<sub>MAC</sub>—were also restricted by the other primate TRIM34 orthologues. In sum, these data support the hypothesis that TRIM34

restriction is a conserved activity in primates with shared specificity for certain primate lentiviral capsids.

### **TRIM34 requires TRIM5α for restriction**

Previously, we found that human TRIM34 requires TRIM5α to restrict HIV-1 N74D capsids [16]. Given that the TRIM34 orthologues tested all show selectivity for the same subset of lentiviral capsids (Figure 1), we reasoned that TRIM5α might be responsible for the capsid specificity of TRIM34-mediated restriction. Notably, for the experiments described in Figure 1 in which all TRIM34 orthologues tested restricted the same subset of capsids, the cells used contained endogenous TRIM5α. Therefore, we next asked whether TRIM5α was more broadly required for TRIM34-mediated restriction of SIV<sub>AGM-SAB</sub>, which was the most potently restricted capsid of the capsids tested in Figure 1. Specifically, we assayed for restriction in TRIM34-overexpressing cells in which we remove endogenous TRIM5α expression. We created pooled knockouts of *TRIM5* in the background of THP-1 *TRIM34* clonal KO cells containing doxycycline-inducible human or macaque TRIM34. Although we observed high KO efficiency scores for the pooled KO lines (Figure 2; legend), these pooled KO cell lines still contained some TRIM5α expression as KO is not complete at a population level. We also generated control cell lines using non-targeting control guides (NTCs); these cells still contained endogenous TRIM5α. We then infected these cells with SIV<sub>AGM-SAB</sub>. Relative to cells missing both TRIM34 and TRIM5α (Figure 2a-b; black symbols), SIV<sub>AGM-SAB</sub> is restricted only in the presence of both TRIM34 and TRIM5α (Figure 2a-b; red symbols). Notably, this was true for both human and rhesus macaque TRIM34 (Figure 2a – human; Figure 2b – macaque). That is, human TRIM5α can fulfill TRIM34's requirement for TRIM5α, even for a TRIM34 orthologue from a different primate species. Conversely, SIV<sub>AGM-SAB</sub> is not restricted either by cells expressing only TRIM34 that are knocked out for TRIM5α (Figure 2a-b; green symbols), nor by cells expressing only endogenous TRIM5α without induction of TRIM34 (Figure 2a-b; blue symbols). Although it does appear that there may be a small amount of restriction in the



presence of TRIM34 only (Figure 2a-b; green symbols), we attribute this to the fact that the *TRIM5* KO cells were generated as a KO pool: therefore, at a population level, some cells in this cell pool still have intact *TRIM5α* expression. Overall, these data suggest that primate *TRIM34* orthologues broadly require *TRIM5α* for restriction of lentiviral capsids.

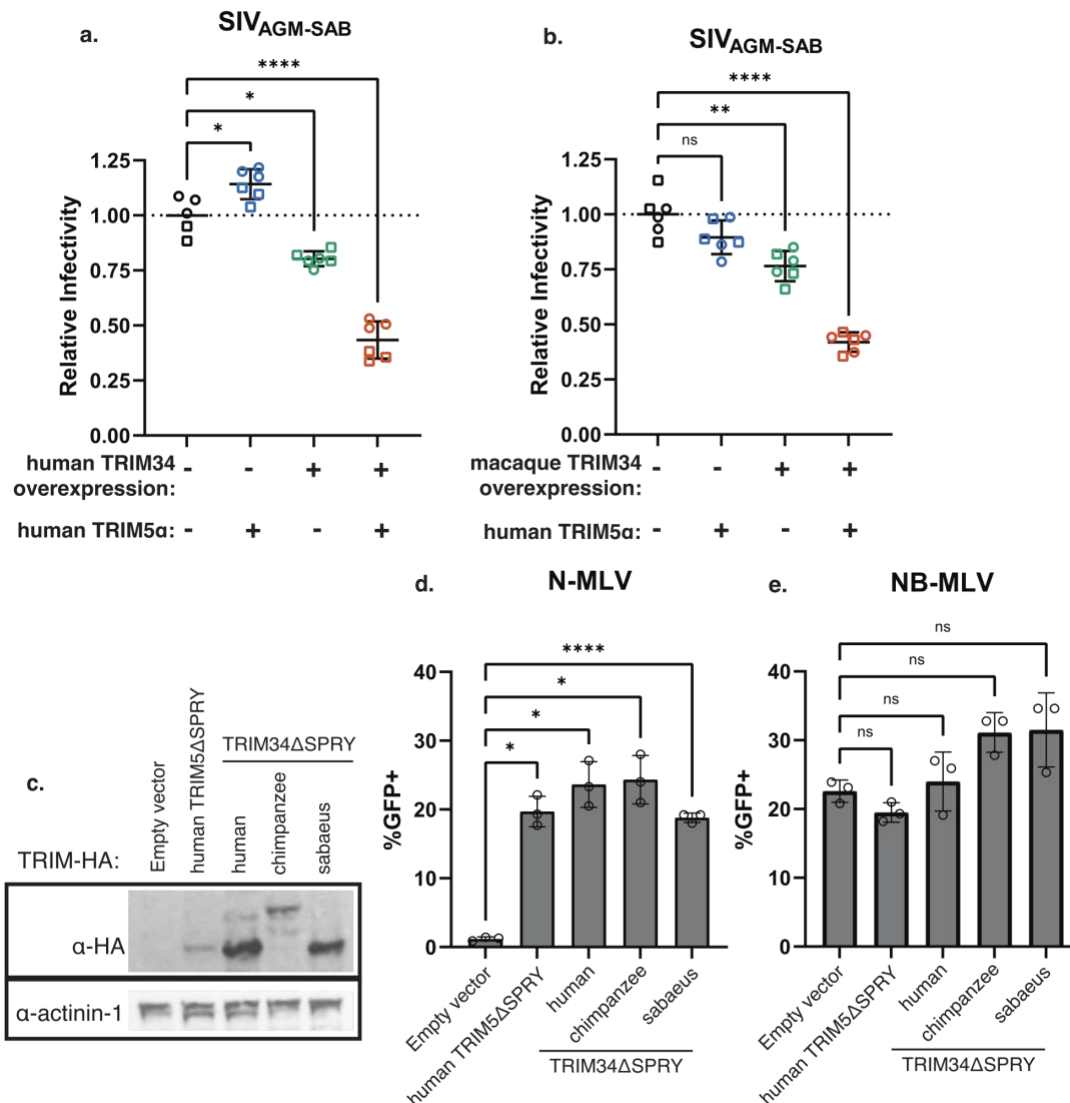

**Figure 2. TRIM34 requires TRIM5α to restrict SIV<sub>AGM-SAB</sub>.**

a-b. THP-1 *TRIM34* clonal KO cells containing doxycycline-inducible *TRIM34* from humans (a) or rhesus macaques (b) were transduced with lentiviral vectors encoding Cas9 and 1 of 2 independent sgRNA against *TRIM5* or a non-targeting control to generate pooled *TRIM5* knockout or NTC cell lines. KO efficiency was assessed by ICE analysis. For human *TRIM34*-expressing cell lines, ICE KO efficiency scores were as follows: *TRIM5* sgRNA 1 (squares) = 76, *TRIM5* sgRNA 2 (circles) = 90. For rhesus macaque *TRIM34*-expressing cells, ICE KO scores were as follows: *TRIM5* sgRNA 1 (squares) = 83, *TRIM5* sgRNA 2 (circles) = 93. Thus, there existed 4 different cellular conditions: no *TRIM34* or *TRIM5α* expression = black symbols, only



endogenous TRIM5 $\alpha$  expression = blue symbols, only overexpressed TRIM34 = green symbols, both endogenous TRIM5 $\alpha$  and overexpressed TRIM34 = red symbols. 1 day after doxycycline induction, cells were infected with SIV<sub>AGM-SAB</sub> CA particles; each infection was performed in triplicate. 2 dpi, infectivity was quantified by flow cytometry. Relative infectivity is normalized to mean infectivity in TRIM5 KO, TRIM34-uninduced cells (black symbols). Data are represented as mean  $\pm$  s.d. from 1 representative experiment. Mean represents average across all 6 replicates.

c. HeLa cells were transduced to stably express primate TRIM $\Delta$ SPRY orthologues or empty vector control. Expression was visualized by immunoblotting.

d-e. HeLa cells stably expressing primate TRIM34 $\Delta$ SPRY orthologues or empty vector control were infected with N-MLV (d) or NB-MLV (e). Level of infection was quantified 2 dpi by flow cytometry. Data are represented as mean  $\pm$  s.d. from 1 representative experiment. Infections were performed in triplicate.

a-b, d-e. p values were calculated by Brown-Forsythe and Welch's 1-way ANOVA with Dunnett's T3 test for multiple comparisons. ns = nonsignificant, \*  $p \leq 0.05$ , \*\*  $p \leq 0.01$ , \*\*\*  $p \leq 0.001$ , \*\*\*\*  $p \leq 0.0001$ .

## Human TRIM5 $\alpha$ functionally interacts with TRIM34 from different primates

We next sought to assess whether TRIM34 orthologues and TRIM5 $\alpha$  can functionally interact with each other via a TRIM5 $\alpha$  restriction assay. Previous work has shown that dimerization and higher-order multimerization are essential for TRIM5 $\alpha$ -mediated restriction [14,25–27]. Furthermore, TRIM5 $\alpha$  has been shown to associate not only with itself but also with TRIM34 via two-hybrid screen and co-immunoprecipitation [9,13,14]. To assess functional interaction of TRIM34 and TRIM5 $\alpha$  more directly, we exploited the fact that TRIM proteins that have been deleted of their SPRY domains (TRIM $\Delta$ SPRY) exert a dominant-negative effect on restriction of N-tropic MLV (N-MLV) by endogenous TRIM5 $\alpha$  constitutively expressed in HeLa cells [13]. Overexpression of human TRIM34 $\Delta$ SPRY inhibits restriction of N-MLV in HeLa cells by the endogenous TRIM5 $\alpha$  [13]. This implies that TRIM34 is able to functionally interact with TRIM5 $\alpha$ . Thus, we asked whether primate TRIM34 $\Delta$ SPRY orthologues could also interact with human TRIM5 $\alpha$  in this assay. The human and rhesus macaque TRIM34 $\Delta$ SPRY constructs were truncated at the start of the SPRY domain, while the chimpanzee TRIM34 $\Delta$ SPRY construct was truncated partway through the SPRY domain, between the v2 and the v3 loops. We overexpressed the HA-tagged human, chimpanzee, and macaque TRIM34 $\Delta$ SPRY constructs in HeLa cells together with human TRIM5 $\Delta$ SPRY as a positive control (Figure 2c). These cells

were then infected with N-MLV. We found that relative to empty vector control, overexpression of all three TRIM34 $\Delta$ SPRY orthologues, as with TRIM5 $\Delta$ SPRY, relieved restriction of N-MLV by human TRIM5 $\alpha$  (Figure 2d). We also infected with NB-tropic MLV (NB-MLV) as a control (Figure 2e), since NB-MLV is not restricted by TRIM5 $\alpha$  [28,29]. These data further support our model that diverse TRIM34 orthologues and human TRIM5 $\alpha$  can functionally interact with each other.

## **Both TRIM34 and TRIM5 $\alpha$ SPRY domains are involved in viral restriction**

Since TRIM5 $\alpha$  is required for restriction by TRIM34 and does not seem to vary depending on which TRIM34 is used, we hypothesized that capsid recognition comes from TRIM5 $\alpha$ , and not from TRIM34. In the case of TRIM5 $\alpha$ -mediated restriction, the SPRY domain, and specifically the v1 loop, determines antiviral specificity [18,21,30]. Furthermore, altering a single amino acid in the human TRIM5 $\alpha$  SPRY domain (arginine 332) in the v1 loop to match the corresponding macaque residue (proline) is sufficient to confer strong restriction of HIV-1 [21,30]. To ask if the TRIM5 $\alpha$  SPRY domain is involved in TRIM34-mediated CA recognition, we used cells that were doubly knocked out for endogenous *TRIM5* and *TRIM34* (THP-1 *TRIM34* *TRIM5* clonal KO cells). In these cells, we introduced inducible vectors expressing wild type (WT) human TRIM34 with WT human TRIM5 $\alpha$ , TRIM5 $\alpha$  in which the v1 loop was deleted (TRIM5 $\alpha$   $\Delta$ v1), and TRIM5 $\alpha$  in which the arginine at position 332 was mutated to a proline (TRIM5 $\alpha$  R332P). We expressed each TRIM individually as well as in the context of each other and confirmed expression levels by Western blot (Figure 3a). In concordance with the results in Figure 2, we found that SIV<sub>AGM-SAB</sub> was restricted only in the presence of both human TRIM34 and human TRIM5 $\alpha$ , but not when either TRIM34 or TRIM5 $\alpha$  were expressed in isolation (Figure 3b; grey bars). Furthermore, in agreement with our previous findings [16], HIV-1 N74D, but not WT HIV-1, was restricted only in the presence of both TRIM34 and TRIM5 $\alpha$  (Figure 3c-d; grey bars).

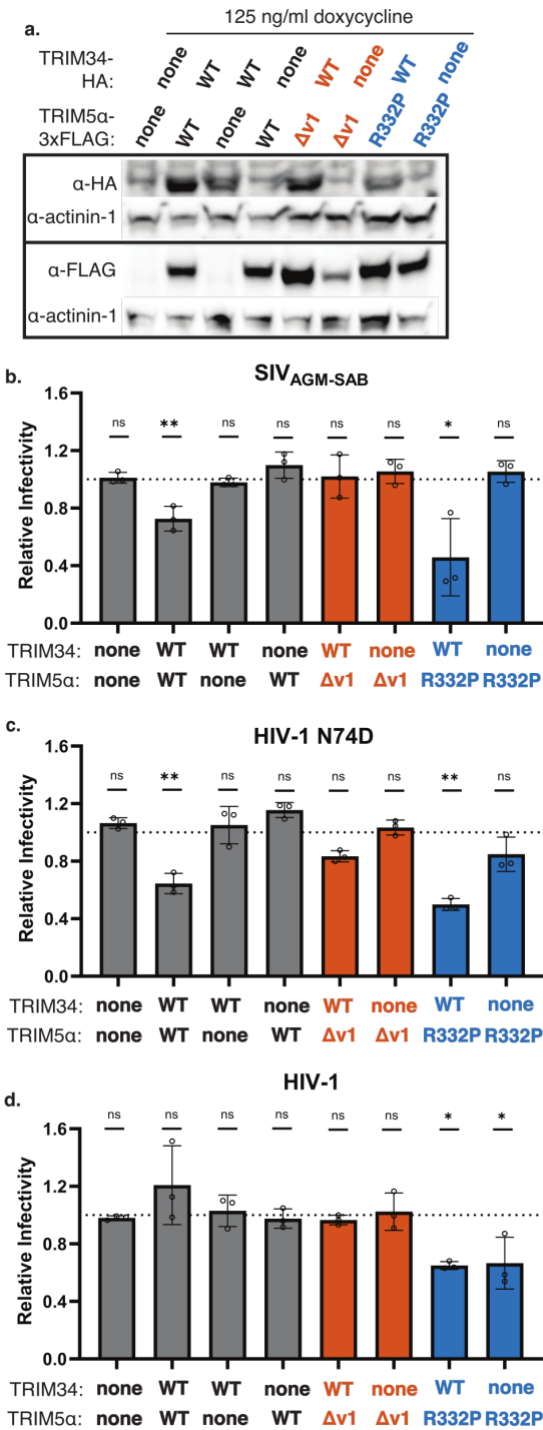

**Figure 3. TRIM5α v1 loop is necessary for restriction of SIV<sub>AGM-SAB</sub>.**

a. THP-1 *TRIM34* clonal KO cells were electroporated with multiplexed sgRNA against *TRIM5*. Single cell clonal lines were generated by limiting dilution to generate a THP-1 *TRIM34* *TRIM5* double KO clonal cell line. Cells were doubly transduced with doxycycline-inducible, HA-tagged human *TRIM34* or empty vector control in tandem with doxycycline-inducible, FLAG-tagged human *TRIM5α*, *TRIM5Δv1*, *TRIM5 R332P*, or empty vector control. Expression levels were visualized by immunoblotting 72 h post-induction.

b-d. THP-1 *TRIM34* *TRIM5* double KO clonal cells co-expressing doxycycline-inducible human *TRIM34* or empty vector control and human *TRIM5α* (grey bars), *TRIM5Δv1* (red bars), *TRIM5* R332P (blue bars), or empty vector control were infected with SIV<sub>AGM-SAB</sub> (b), HIV-1 N74D (c), or HIV-1 (d) CA 1 day post-induction. Levels of infection were quantified 2 dpi by flow cytometry. Relative infectivity in induced cells (solid bars) is normalized to average infectivity in uninduced control cells (not shown). Data are represented as mean +/- s.d. of 3 technical replicates from 1 representative experiment. One-sided p values were calculated by Welch's *t*-test. ns = nonsignificant, \*  $p \leq 0.05$ , \*\*  $p \leq 0.01$ , \*\*\*  $p \leq 0.001$ , \*\*\*\*  $p \leq 0.0001$ .

Given that *TRIM5* is required for *TRIM34*-mediated restriction, we next asked whether the *TRIM5α* v1 loop, known to be important for capsid specificity by *TRIM5α*, was essential for restriction by *TRIM34*. We found that unlike co-expression of *TRIM34* with full-length *TRIM5α*, co-expression of *TRIM34* with *TRIM5α Δv1* was not sufficient for restriction of either SIV<sub>AGM-SAB</sub> and HIV-1 N74D (Figure 3b-c; red bars). This suggests that the *TRIM5α* v1 loop is required for *TRIM34*-mediated restriction.

We then asked whether changing the identity of the *TRIM5α* v1 loop, but not deleting it entirely, could also alter viral specificity. To assess this question, we generated the mutant *TRIM5α* R332P, which converts the human residue at position 332 to the rhesus macaque residue and has been shown to have enhanced antiviral inhibition of HIV-1 [21,30]. We co-expressed these cells with *TRIM34* and infected with SIV<sub>AGM-SAB</sub>, HIV-1 N74D, or HIV-1. In accordance with the literature, *TRIM5α* R332P was able to restrict HIV-1 while WT *TRIM5α* did not (Figure 3d; blue bars) [21,30]. Furthermore, restriction of HIV-1 by *TRIM5α* R332P was agnostic to the presence of *TRIM34*; that is, *TRIM34* did not appear to augment restriction of HIV-1 by *TRIM5α* R332P (Figure 3d; blue bars). Similar to wild type *TRIM34* and *TRIM5α*, *TRIM34* co-expression with the mutant *TRIM5α* R332P allele maintained restriction of the N74D CA mutant virus (Figure 3c; blue bars). Interestingly, *TRIM5α* R332P alone did not restrict HIV-1 N74D, in contrast to WT HIV-1 (Figure 3c-d; blue bars). This suggests that *TRIM34* is critical for restriction of HIV-1 N74D, even in the presence of a *TRIM5α* mutant that is more potent against WT HIV-1. Finally, *TRIM34* co-expressed with *TRIM5α* R332P restricted SIV<sub>AGM-SAB</sub> CA,

whereas TRIM5 $\alpha$  R332P alone did not (Figure 3b; blue bars). These findings support a role for both the TRIM5 $\alpha$  v1 loop and for TRIM34 in viral recognition and specificity.

# **TRIM34 SPRY Domain is Required for Restriction**

To more directly test whether the TRIM34 SPRY domain plays a role in antiviral activity and specificity, we generated a chimeric protein that encodes the TRIM34 RING, Bbox and coiled-coil domains in frame with the TRIM5 SPRY domain (TRIM34 RBCC-TRIM5 SPRY) (Figure 4a). We hypothesized that if the TRIM34 SPRY domain was required for restriction, the chimera would lose restriction relative to full-length TRIM34. We transduced this chimera into THP-1 *TRIM34* clonal KO cells and confirmed expression by Western blot (Figure 4b). We assayed this construct for restriction in our THP-1 cells that lack TRIM34 expression but do contain endogenous, full-length TRIM5 $\alpha$ . We found that in the presence of endogenous TRIM5 $\alpha$ , the TRIM34 RBCC-TRIM5 $\alpha$  SPRY chimera was not able to restrict SIV<sub>AGM-SAB</sub> CA (Figure 4c). Therefore, the TRIM34 SPRY domain, in addition to the TRIM5 $\alpha$  SPRY domain, is involved in restriction.

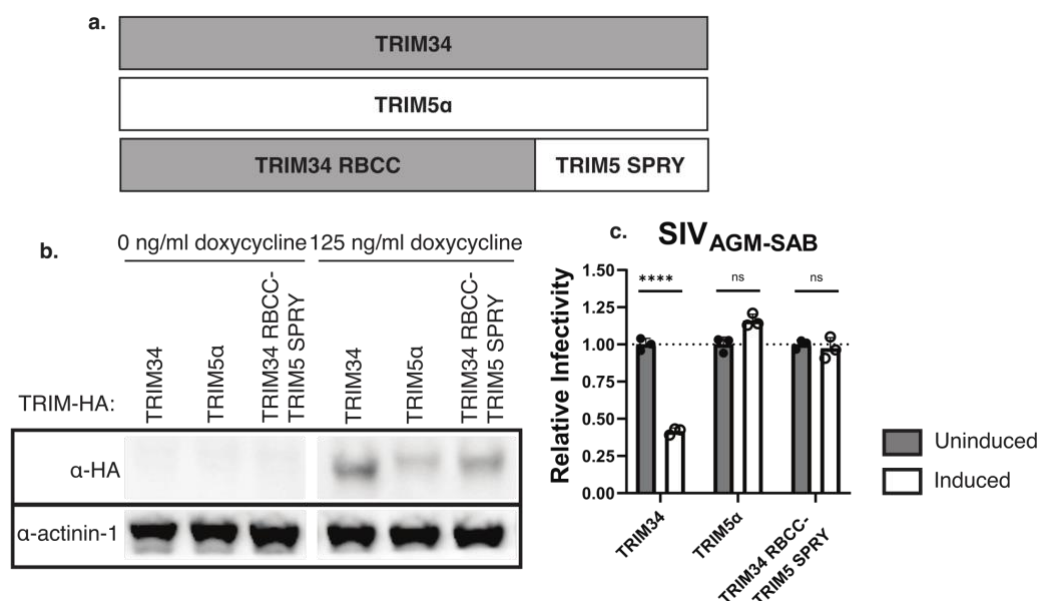

**Figure 4. TRIM34 SPRY domain is necessary for restriction of SIV<sub>AGM-SAB</sub>.**

a. Schematic of TRIM34 RBCC-TRIM5 SPRY chimera

b. THP-1 *TRIM34* clonal KO cells were generated by electroporation of multiplexed sgRNA against *TRIM34* and single cell sorting. Cells were transduced with doxycycline-inducible HA-tagged human TRIM34, TRIM5 $\alpha$ , or TRIM34-TRIM5 $\alpha$  chimeras. Expression levels were visualized by immunoblotting 72 h post-induction.

c. THP-1 *TRIM34* clonal KO cells expressing doxycycline-inducible human TRIM34, TRIM5 $\alpha$ , or TRIM34 RBCC-TRIM5 SPRY were infected with SIV<sub>AGM-SAB</sub> CA particles 1 day post-induction. Level of infection was quantified 2 dpi by flow cytometry. Relative infectivity in induced cells (white bars) is normalized to average infectivity in uninduced control cells (grey bars). Data are represented as mean  $\pm$  s.d. from 1 representative experiment comprising 3 technical replicates. One-sided p values were calculated by Welch's *t*-test. ns = nonsignificant, \*  $p \leq 0.05$ , \*\*  $p \leq 0.01$ , \*\*\*  $p \leq 0.001$ , \*\*\*\*  $p \leq 0.0001$ .

## DISCUSSION

Human TRIM34 was recently identified as a restriction factor of the CA mutant HIV-1 N74D and certain SIVs [16]. Here we show that this antiviral phenotype is a broadly conserved function of primate *TRIM34* genes. We find that the same subset of lentiviral capsids is restricted by a diverse panel of TRIM34 orthologues, irrespective of TRIM34 species of origin. Moreover, we find that although antiviral specificity does not seem to vary with the identity of TRIM34, both the TRIM34 and TRIM5 $\alpha$  SPRY domains are critical to restriction, suggesting that TRIM5 confers a level of specificity to the TRIM34 restriction.

Despite the lack of evidence for positive selection on TRIM34, primate TRIM34 alleles have broadly maintained the ability to restrict certain primate lentiviruses. This is surprising in light of the fact that positive selection is a marker of critical regions of direct host-viral interaction. We propose that although TRIM34 lacks this characteristic, it utilizes TRIM5 $\alpha$ , which is a rapidly-evolving gene in primates, to restrict lentiviruses. Prior work has shown that TRIM34 and TRIM5 $\alpha$  are capable of multimerizing *in vitro* in addition to binding capsid [9,13,14]. In this work we demonstrate that TRIM5 $\alpha$  can functionally interact with a number of primate TRIM34 orthologues. This supports a model in which TRIM5 $\alpha$  and TRIM34 multimerize to form a higher-order structure that enables both SPRY domains to interact with the viral capsid. Therefore, despite the lack of an overt, positively-selected site of viral interface on TRIM34, TRIM34 restricts viral infection through interaction with the rapidly-evolving TRIM5 protein. It is



also possible that physical interaction between TRIM34 and TRIM5 $\alpha$  alters the half-life of one or both proteins, affecting turnover rate or stability. Prior work has demonstrated that different TRIMs have different half-lives, and that alterations to the RING or Bbox domains of TRIM proteins can affect protein turnover [14,31,32]; thus, it is possible that interactions between different TRIMs might lead to changes in stability.

Another possibility is that TRIM34 could be filling the role of an effector molecule. Previously, the TRIM5 $\alpha$  RING domain has been implicated as an E3 ubiquitin ligase that acts as a signal transducer to initiate innate immune activation subsequent to CA sensing by the TRIM5 $\alpha$  SPRY domain [33–35]. In the case of TRIM34, it is possible that TRIM5 $\alpha$  is responsible for recognizing CA while TRIM34's E3 ligase domain contributes to downstream signaling, capsid degradation, or recruitment of other molecules that aid restriction. Although Lascano *et al.* found that TRIM34 does not activate AP-1, it remains possible that it is acting by another mechanism [34]. Notably, these models are not mutually exclusive and could function in tandem with TRIM34 aiding TRIM5 $\alpha$  in more than one capacity.

Our findings suggest that the SPRY domains of both TRIM34 and TRIM5 $\alpha$  are important for restriction. On its own, human TRIM5 $\alpha$  is a relatively weak restriction factor. We propose that TRIM34 can assist human TRIM5 $\alpha$  to restrict some—but not all—viral capsids. For example, TRIM5 $\alpha$  in the presence of TRIM34 is able to restrict SIV<sub>AGM-SAB</sub>; conversely, even in the presence of TRIM34, TRIM5 $\alpha$  is still unable to restrict HIV-1. One possibility is that the TRIM34 SPRY domain is contributing to viral recognition. Previous work has shown that TRIM34 is able to bind HIV-1 CA-NC complexes *in vitro*, even though it does not restrict HIV-1, raising the possibility that TRIM34 may still contribute to capsid binding [14,36]. Although the v1 loop of TRIM34 has not undergone positive selection and is only 6 amino acids long, we cannot exclude the possibility that it, or one of the other variable loops, might contribute to capsid recognition. Given the relatively high conservation of the variable loops of the primate TRIM34 alleles that we assessed (no amino acid differences in v1, v3, or v4; 1 amino acid difference in



each allele in v2), this could explain the observation that all the TRIM34 alleles tested restricted the same subset of viruses. Furthermore, the observation that TRIM5 $\alpha$  R332P—which gains restriction of HIV-1 relative to WT TRIM5 $\alpha$ —does not restrict HIV-1 N74D alone and only restricts it in the presence of TRIM34, supports the idea that TRIM34 could be assisting in capsid recognition beyond the capacity of TRIM5 $\alpha$  alone. Thus, as many TRIM5 $\alpha$  alleles can act as potent restriction factors of a few very specific viral capsids, but a poor restriction factor of many others, we speculate that TRIM34 might act as a cofactor to enable TRIM5 $\alpha$  to restrict viral capsids that TRIM5 $\alpha$  is not able to restrict on its own.

It is intriguing that all the TRIM34 orthologues tested restricted the same subset of viruses: SIV<sub>AGM-SAB</sub>, SIV<sub>AGM-TAN</sub>, and SIV<sub>MAC</sub>. Notably, only viruses originating from Old World monkeys were restricted, whereas the hominid viruses, HIV-1 and SIV<sub>CPZ</sub>, were not restricted. It is possible that this is driven by the identity of TRIM5 $\alpha$ : HIV-1 and SIV<sub>CPZ</sub> are better evolved to evade restriction by human TRIM5 $\alpha$  compared to the Old World monkey viruses [23]. The three restricted viruses share only 70.6% pairwise amino acid identity across their CA regions, making it difficult to identify critical residues or motifs that determine restriction. We explored the possibility that restriction might be dependent on CypA binding. However, CypA binding capacity varied across the restricted viruses. For example, SIV<sub>AGM-TAN</sub> does bind CypA, while SIV<sub>MAC</sub> and SIV<sub>AGM-SAB</sub> do not [13,37–39]. Furthermore, while HIV-1 is well-established to bind and incorporate CypA into virions, the CypA binding capacity of HIV-1 N74D is controversial [15,40,41]. Thus, at minimum, restriction does not depend exclusively on CypA binding. Instead, restriction of these capsids by TRIM34 and TRIM5 $\alpha$  may be dependent on other unknown features that distinguish these capsids. A number of blocks to HIV infection that are capsid-dependent have been characterized—for example, Lv2, Lv3, and Lv4—for which the responsible cellular components have either not been identified or have only been partly identified [42–46]. It is possible that TRIM34 could contribute to one or more of these blocks.

We find that TRIM34 alleles from a broad spectrum of primates, when paired with TRIM5 $\alpha$ , are able to restrict capsids that neither TRIM is able to restrict on its own. Despite lacking signs of positive selection characteristic of many restriction factors, TRIM34—acting in tandem with TRIM5 $\alpha$ —can act as a barrier to cross-species transmission events. It is possible that these proteins have co-evolved such that TRIM34 can enhance or modify TRIM5 $\alpha$ 's antiviral potential. Indeed, not only do host immune proteins evolve in the context of the pathogens they counteract, but they also evolve in the context of other, complementary host proteins. Thus, our data suggest that restriction factors evolve not only in isolation in response to evolutionary pressures exerted by viral pathogens but may also co-evolve with each other resulting in more powerful antiviral activity than either could achieve on its own.

## ACKNOWLEDGEMENTS

We thank Jeannette Tenthorey and Vanessa Montoya for critical feedback of this manuscript. We thank Melissa Kane for sharing the doxycycline-inducible vector system, Jeannette Tenthorey for the TRIM5 mutant constructs, and Theodora Hatzioannou for the chimeric capsid constructs. This work was supported by the Viral Pathogenesis and Evolution Training Grant (NIH T32 AI083203) awarded to J.T., DP1 DA051110 to M.E., and NIH/NIAID R01 AI147877 and U54 AI170856, to M.O. This research was supported by the Genomics, Bioinformatics, and Flow Cytometry Shared Resources, RRID:SCR\_022606, of the Fred Hutchinson/University of Washington Cancer Consortium (P30 CA015704).

## AUTHOR CONTRIBUTIONS

Conceptualization, methodology, writing, and funding acquisition were performed by J.T., M.E., and M.O. Investigation was conducted by J.T., A.K., and A.L.F. Validation, formal analysis, and visualization were performed by J.T. and A.K. Supervision was provided by M.E. and M.O.

## **MATERIALS AND METHODS**

### **Cell culture**

All cells were cultured at 37°C and 5% CO<sub>2</sub>. THP-1 monocytic cells (American Type Culture Collection, Manassas, VA, #TIB-202) were cultured in Roswell Park Memorial Institute 1640 Media (RPMI 1640) (Gibco, Grand Island, NY, #118875-093) supplemented with 10% v/v fetal bovine serum (FBS) (GE Cytiva, Marlborough, MA #SH30541.03), 100 U/mL penicillin-streptomycin (Gibco #15140-122), 10mM HEPES (Gibco #15630-080), 1mM sodium pyruvate (Gibco #11360-070), 2 g/L D-Glucose (Gibco #A24940-01), and 1X GlutaMAX supplement (Gibco #35050-061). HEK 293T/17 cells (American Type Culture Collection #CRL-11268) and HeLa cells (American Type Culture Collection #CCL-2) were cultured in Dulbecco's Modified Eagle Medium (DMEM) (Gibco #11965-092) supplemented with 10% fetal bovine serum, and 100 U/mL penicillin-streptomycin.

### **Cloning, plasmids, and virus production**

All transfections were performed on HEK 293T/17 cells in the presence of serum-free DMEM and Trans-IT transfection reagent (Mirus Bio, Madison, WI, #MIR 2305). All transductions were performed by spinoculation at 1100 x *g* for 30 min at 30°C.

Fluorescent reporter viruses were generated by transfection of a three-plasmid system: pMD2.G (Addgene, Watertown, MA, #12259, a gift from Didier Trono) for expression of VSV-G envelope; a variable plasmid for expression of a chimeric gag/pol containing an NL4-3 backbone and HIV-1 [22], SIV<sub>CPZ</sub>, SIV<sub>AGM-SAB</sub>, or SIV<sub>MAC</sub> CA (gifts from Theodora Hatzioannou) [23]; and either pALPS-eGFP (Addgene #101323, a gift from Jeremy Luban) [47] or pHIV-zsGreen (Addgene #18121, a gift from Bryan Welm and Zena Werb) [48]. SIV<sub>CPZ</sub>, SIV<sub>AGM-SAB</sub>, or SIV<sub>MAC</sub> chimeric virus particles were made with pALPS-eGFP, and HIV-1 virus particles were made with pHIV-zsGreen. The SIV<sub>MAC</sub> CA construct contained the mutation A77V. Luciferase reporter viruses were generated by transfection of a two-plasmid system: SIV<sub>agm</sub>TAN E- R- luc [24] and L-VSV-G (VSV glycoprotein expression) [49]. Particles were harvested 2 days post-

transfection, syringe-filtered through 0.22µM PES membranes, and frozen at -80°C. N-MLV reporter viruses were generated by transfection of a three-plasmid system: pCIG3-N for expression N-MLV gag/pol (Addgene #132941, a gift from Jeremy Luban) [50], pQCXIP-eGFP (a gift from Jeannette Tenthorey) [21] for expression of a fluorescent reporter, and pMD2.G for expression of VSV-G envelope. NB-MLV reporter viruses were generated by transfection of a four-plasmid system: JK3 for expression of NB-MLV gag/pol [49], L-VSV-G for expression of VSV-G envelope [49], CMV-tat for transactivation [49], and pQCXIP-eGFP for expression of a fluorescent reporter.

pLentiCRISPR-v2 (Addgene #52961, a gift from Feng Zhang) constructs were generated by BsmBI (New England BioLabs, Ipswich, MA, #R0580) restriction cloning of TRIM5 guides into pLentiCRISPR-v2, a lentiviral vector encoding for Cas9 [51]. pLentiCRISPR-v2 containing guides were transfected with pSPAX2 (Addgene #12260, a gift from Didier Trono) and pMD2.G to generate lentiviral particles. Particles were harvested 2 days post-transfection, syringe-filtered through 0.22 µM PES membranes, and frozen at -80°C.

HA-tagged TRIM34 and 3xFLAG-tagged TRIM5α codon-optimized expression constructs (Supplemental data) were synthesized by Twist Bioscience (South San Francisco, CA). TRIM5α mutant constructs (TRIM5α v1 loop and TRIM5α R332P) were a gift from Jeannette Tenthorey [21]. TRIM constructs were cloned into pLKO (a gift from Melissa Kane) [52] by Sfil (New England BioLabs #R0123S) restriction enzyme digest. pLKO-TRIM constructs were transfected along with pMD2.G and pSPAX2 to generate particles. Particles were harvested at 2 and 3 days post-transfection, cell pellets spun down at 300 x g, and supernatants frozen at -80°C.

HA-tagged TRIM34ΔSPRY constructs were cloned in pQCXIP (TaKaRa Bio, San Jose, CA, #631516) by SbfI (New England BioLabs #R3642S) and NotI (New England Biolabs #R3189S) restriction digest. pQCXIP-TRIM34ΔSPRY constructs were transfected along with

pJK3 (MLV gag/pol), L-VSV-G (VSV-G envelope), and CMV-tat to generate particles. Particles were harvested 2 days post-transfection.

### **CRISPR Knockouts**

Clonal knockout lines in THP-1 cells were generated by electroporation of multiplexed small guide RNA (sgRNA) from Gene Knockout Kit v2 (Synthego, Redwood City, CA) against *TRIM34* (guide sequences = CTTGCTTAACGTACAAG, CCACAGTCTAGACTCAA, GCAGTGACCAGCATGGG) or *TRIM5* (guide sequences = GGUAACUGAUCCGGCACACA, ACUUCUUGUGGUUUGCAGUG, CCUGGUUAAUGUAAAGGAGG). Single cell clonal lines were generated by single cell sorting (*TRIM34*) or limiting dilution (*TRIM5*). Knockout efficiency was validated by Interference of CRISPR Edits (ICE) analysis (Synthego) [53].

Pooled knockout lines were generated by transduction of THP-1 cells with lentiviral preps containing guides delivered by pLentiCRISPR-v2. *TRIM5* guide sequences = TCACCACACGTTCTCACAG and GTTGATCATTGTGCACGCCA. NTC guide sequences = GGGCCCGCATAGGATATCGC and TAGACAACCGCGGAGAATGC. Cells were spinoculated in the presence of 20 µg/mL DEAE-Dextran (Pharmacia Fine Chemicals, Uppsala, Sweden, #17-0350-01) and then selected in 10 µg/mL blasticidin S HCl (Gibco #A11139-03). Knockout efficiency was validated by ICE analysis [53].

### **Inducible Overexpression**

Doxycycline-inducible expression of *TRIM34* and *TRIM5α* was achieved by transduction of lentiviral preps containing pLKO TRIM constructs in THP-1 cells. Cells were spinoculated in the presence of 5 µg/mL polybrene (EMD Millipore, Burlington, MA, #TR-1003-G) and then selected in 0.5 µg/mL puromycin (*TRIM34*) (Sigma-Aldrich, St. Louis, MO, #P8833-25MG) or 10 µg/mL blasticidin (*TRIM5α*). Protein expression was induced by the addition of 125 ng/mL doxycycline hyclate (Sigma-Aldrich #D9891-5G) to cells cultured in complete RPMI 1640 containing tetracycline-approved FBS (Sigma-Aldrich #F0926-50ML).

Stable expression of TRIM34 $\Delta$ SPRY was achieved by transduction of lentiviral preps containing pQCXIP constructs expressing TRIM $\Delta$ SPRY constructs. HeLa cells were spinoculated in the presence of 20  $\mu$ g/mL DEAE-Dextran. Selection was performed in the presence of 1  $\mu$ g/mL puromycin.

# **Restriction assays**

1 day after induction of TRIM expression, THP-1 cells were infected with chimeric CA virus particles expressing a fluorescent reporter. Cells were spinoculated in the presence of 20  $\mu$ g/mL DEAE-Dextran. 2 dpi, relative infectivity was quantified by flow cytometry using a FACSCelesta Analyzer (BD Biosciences, San Jose, CA) or Bright-Glo luciferase assay reagent (Promega, Madison, WI #E2620) using a LUMIstar Omega luminometer (BMG Labtech, Ortenberg, Germany).

# **N-MLV Restriction assay**

HeLa cells that had been transduced to stably express TRIM34 $\Delta$ SPRY constructs were infected with N-MLV particles expressing an eGFP reporter by spinoculation in the presence of 20  $\mu$ g/mL DEAE-Dextran. Infectivity was assessed 2 dpi by flow cytometry using an LSRFortessa Cell Analyzer (BD Biosciences).

# **Western blotting**

3 days after induction of TRIM expression, THP-1 cells were harvested; 1 day prior to infection, HeLa cells were harvested. Cells were washed once with PBS. Cells were then lysed on ice for 30 min in 20 mM HEPES (Fisher Scientific, Fair Lawn, NJ, #BP310-1) containing 8 M urea (Sigma-Aldrich #U-6504), 50 mM DL-Dithiothreitol (DTT) (Gold Biotechnology, St. Louis, MO, #DTT10), 0.1% w/v SDS (Fisher Scientific #BP166-500), 1.5 mM MgCl<sub>2</sub> (Sigma-Aldrich #208337-100G), 0.5 mM CaCl<sub>2</sub> (Sigma-Aldrich #C-3306), 50  $\mu$ g/mL DNase I (Roche Diagnostics, Mannheim, Germany, #10104159001), and 1X EDTA-free protease inhibitor cocktail (Roche Diagnostics #11836170001). 6X SDS-PAGE sample loading buffer (G Biosciences, St. Louis, MO #785-701) containing 5% v/v 2-mercaptoethanol (Sigma-Aldrich

#M3148-100ML) was added to lysates. Lysates were acid treated with 50 mM HCl (Sigma-Aldrich #320331-300ML) and then boiled at 95°C for 7 min. After cooling, lysates were neutralized with 50 mM NaOH (Sigma-Aldrich #72068-100ML). Products were resolved by SDS-PAGE on NuPage Bis-Tris 4-12% acrylamide gels (Invitrogen, Carlsbad, CA, #NP0335BOX) and transferred onto nitrocellulose membranes (Bio-Rad Laboratories, Hercules, CA, #1620115). Membranes were blocked with 2% w/v milk (Research Products International, Mt. Prospect, IL, #M17200-500.0) and 2% w/v bovine serum albumin (Sigma-Aldrich #A7906-100G) in tris-buffered saline (Fisher Scientific #BP152-5) containing 1% v/v Tween-20 (Fisher Scientific #BP152-1) (TBS-T). Primary antibodies were incubated overnight at 4°C: rabbit anti-HA high affinity at 1:500 (Roche Diagnostics #ROAHAHA), mouse anti-FLAG M2 at 1:500 (Sigma-Aldrich #F1804), and rabbit anti-alpha actinin-1 at 1:1000 (Bio-Rad Laboratories #VPA00889). Membranes were washed with TBS-T and then incubated with HRP-conjugated secondary antibodies for 1 h at RT: goat anti-rat IgG at 1:2000 (Abcam, Waltham, MA #ab97057), sheep anti-mouse IgG at 1:2000 (GE Cytiva #NA931), and donkey anti-rabbit IgG at 1:2000 (GE Cytiva #NA934V). Membranes were washed again and then incubated with SuperSignal West Pico substrate (HA and alpha actinin-1 blots) (Thermo Fisher Scientific, Waltham, MA, #34580) or Supersignal West Femto substrate (FLAG blots) (Thermo Fisher Scientific #34095) for 3 min. Membranes were imaged with a ChemiDoc MP imaging system (Bio-Rad Laboratories).

## Statistical methods

For comparisons of 2 independent variables, one-tailed p values were computed by Welch's *t*-test. For comparisons of 3 or more independent variables, p values were computed by Brown-Forsythe and Welch's 1-way ANOVA with Dunnett's T3 test for multiple comparisons. All calculations and data visualizations were performed using GraphPad Prism version 9.3 (GraphPad Software, San Diego, CA).



# REFERENCES

1. Nisole S, Stoye JP, Saïb A. TRIM family proteins: Retroviral restriction and antiviral defence. *Nat Rev Microbiol.* Nature Publishing Group; 2005;3:799–808.
2. Stremlau M, Owens CM, Perron MJ, Kiessling M, Autissier P, Sodroski J. The cytoplasmic body component TRIM5 $\alpha$  restricts HIV-1 infection in Old World monkeys. *Nature.* 2004;427:848–53.
3. Keckesova Z, Ylinen LMJ, Towers GJ. The human and African green monkey TRIM5 $\alpha$  genes encode Ref1 and Lv1 retroviral restriction factor activities. *Proc Natl Acad Sci U S A.* 2004;101:10780–5.
4. Hatzioannou T, Perez-Caballero D, Yang A, Cowan S, Bieniasz PD. Retrovirus resistance factors Ref1 and Lv1 are species-specific variants of TRIM5 $\alpha$ . *Proc Natl Acad Sci U S A.* 2004;101:10774–9.
5. Stremlau M, Perron M, Lee M, Li Y, Song B, Javanbakht H, et al. Specific recognition and accelerated uncoating of retroviral capsids by the TRIM5 $\alpha$  restriction factor. *Proc Natl Acad Sci U S A.* 2006;103:5514–9.
6. Sebastian S, Luban J. TRIM5 $\alpha$  selectively binds a restriction-sensitive retroviral capsid. *Retrovirology.* BioMed Central; 2005;2:40.
7. Ganser-Pornillos BK, Pornillos O. Restriction of HIV-1 and other retroviruses by TRIM5. *Nat Rev Microbiol.* Springer US; 2019;17:546–56.
8. Song B, Javanbakht H, Perron M, Park DH, Stremlau M, Sodroski J. Retrovirus Restriction by TRIM5 $\alpha$  Variants from Old World and New World Primates. *J Virol.* 2005;79:3930–7.
9. Reymond A, Meroni G, Fantozzi A, Merla G, Cairo S, Luzi L, et al. The tripartite motif family identifies cell compartments. *EMBO Journal.* 2001;20:2140–51.
10. Javanbakht H, Diaz-Griffero F, Stremlau M, Si Z, Sodroski J. The contribution of RING and B-box 2 domains to retroviral restriction mediated by monkey TRIM5 $\alpha$ . *Journal of Biological Chemistry.* © 2005 ASBMB. Currently published by Elsevier Inc; originally published by American Society for Biochemistry and Molecular Biology.; 2005;280:26933–40.
11. Javanbakht H, Yuan W, Yeung DF, Song B, Diaz-Griffero F, Li Y, et al. Characterization of TRIM5 $\alpha$  trimerization and its contribution to human immunodeficiency virus capsid binding. *Virology.* 2006;353:234–46.
12. Li X, Sodroski J. The TRIM5 $\alpha$  B-Box 2 Domain Promotes Cooperative Binding to the Retroviral Capsid by Mediating Higher-Order Self-Association. *J Virol.* 2008;82:11495–502.
13. Zhang F, Hatzioannou T, Perez-Caballero D, Derse D, Bieniasz PD. Antiretroviral potential of human tripartite motif-5 and related proteins. *Virology.* 2006;353:396–409.
14. Li X, Gold B, O’hUigin C, Diaz-Griffero F, Song B, Si Z, et al. Unique features of TRIM5 $\alpha$  among closely related human TRIM family members. *Virology.* 2007;360:419–33.
15. Ambrose Z, Lee K, Ndjomou J, Xu H, Oztot I, Matous J, et al. Human Immunodeficiency Virus Type 1 Capsid Mutation N74D Alters Cyclophilin A Dependence and Impairs Macrophage Infection. *J Virol.* 2012;86:4708–14.

16. Ohainle M, Kim K, Keceli SK, Felton A, Campbell E, Luban J, et al. TRIM34 restricts HIV-1 and SIV capsids in a TRIM5 $\alpha$ -dependent manner. *PLoS Pathog.* 2020;16:1–22.
17. Orimo A, Tominaga N, Yoshimura K, Yamauchi Y, Nomura M, Sato M, et al. Molecular cloning of ring finger protein 21 (RNF21)/interferon-responsive finger protein (ifp1), which possesses two RING-B box-coiled coil domains in tandem. *Genomics.* 2000;69:143–9.
18. Sawyer SL, Wu LI, Emerman M, Malik HS. Positive selection of primate TRIM5 $\alpha$  identifies a critical species-specific retroviral restriction domain. *Proc Natl Acad Sci U S A.* 2005;102:2832–7.
19. van Valen L. A New Evolutionary Law. *Evol Theor.* 1973;1:1–30.
20. Daugherty MD, Malik HS. Rules of Engagement: Molecular Insights from Host-Virus Arms Races. *Annu Rev Genet. Annual Reviews ;* 2012;46:677–700.
21. Tenthorey JL, Young C, Sodeinde A, Emerman M, Malik HS. Mutational resilience of antiviral restriction favors primate TRIM5 $\alpha$  in host-virus evolutionary arms races. *Elife.* 2020;9:1–36.
22. Berthouix L, Sebastian S, Sokolskaja E, Luban J. Lv1 Inhibition of Human Immunodeficiency Virus Type 1 Is Counteracted by Factors That Stimulate Synthesis or Nuclear Translocation of Viral cDNA. *J Virol. American Society for Microbiology;* 2004;78:11739–50.
23. Kratovac Z, Virgen CA, Bibollet-Ruche F, Hahn BH, Bieniasz PD, Hatzioannou T. Primate Lentivirus Capsid Sensitivity to TRIM5 Proteins. *J Virol.* 2008;82:6772–7.
24. Mariani R, Chen D, Schröfelbauer B, Navarro F, König R, Bollman B, et al. Species-specific exclusion of APOBEC3G from HIV-1 virions by Vif. *Cell. Elsevier;* 2003;114:21–31.
25. Li X, Yeung DF, Fiegen AM, Sodroski J. Determinants of the higher order association of the restriction factor TRIM5 $\alpha$  and other tripartite motif (TRIM) proteins. *Journal of Biological Chemistry.* © 2011 ASBMB. Currently published by Elsevier Inc; originally published by American Society for Biochemistry and Molecular Biology.; 2011;286:27959–70.
26. Perez-Caballero D, Hatzioannou T, Yang A, Cowan S, Bieniasz PD. Human Tripartite Motif 5 $\alpha$  Domains Responsible for Retrovirus Restriction Activity and Specificity. *J Virol.* 2005;79:8969–78.
27. Campbell EM, Perez O, Anderson JL, Hope TJ. Visualization of a proteasome-independent intermediate during restriction of HIV-1 by rhesus TRIM5 $\alpha$ . *Journal of Cell Biology. The Rockefeller University Press;* 2008;180:549–61.
28. Yap MW, Nisole S, Lynch C, Stoye JP. Trim5 $\alpha$  protein restricts both HIV-1 and murine leukemia virus. *Proc Natl Acad Sci U S A. National Academy of Sciences;* 2004;101:10786–91.
29. Towers G, Bock M, Martin S, Takeuchi Y, Stoye JP, Danos O. A conserved mechanism of retrovirus restriction in mammals. *Proc Natl Acad Sci U S A. The National Academy of Sciences;* 2000;97:12295–9.
30. Yap MW, Nisole S, Stoye JP. A Single Amino Acid Change in the SPRY Domain of Human Trim5 $\alpha$  Leads to HIV-1 Restriction. *Current Biology.* 2005;15:73–8.
31. Kar AK, Diaz-Griffero F, Li Y, Li X, Sodroski J. Biochemical and Biophysical Characterization of a Chimeric TRIM21-TRIM5 $\alpha$  Protein. *J Virol.* 2008;82:11669–81.

32. Diaz-Griffero F, Li X, Javanbakht H, Song B, Welikala S, Stremlau M, et al. Rapid turnover and polyubiquitylation of the retroviral restriction factor TRIM5. *Virology*. 2006;349:300–15.
33. Pertel T, Hausmann S, Morger D, Züger S, Guerra J, Lascano J, et al. TRIM5 is an innate immune sensor for the retrovirus capsid lattice. *Nature*. 2011;472:361–5.
34. Lascano J, Uchil PD, Mothes W, Luban J. TRIM5 Retroviral Restriction Activity Correlates with the Ability To Induce Innate Immune Signaling. *J Virol*. 2016;90:308–16.
35. Fletcher AJ, Vaysburd M, Maslen S, Zeng J, Skehel JM, Towers GJ, et al. Trivalent RING Assembly on Retroviral Capsids Activates TRIM5 Ubiquitination and Innate Immune Signaling. *Cell Host Microbe*. Elsevier Inc.; 2018;24:761-775.e6.
36. Yang Y, Brandariz-Nuñez A, Fricke T, Ivanov DN, Sarnak Z, Diaz-Griffero F. Binding of the rhesus TRIM5α PRYSPRY domain to capsid is necessary but not sufficient for HIV-1 restriction. *Virology*. Academic Press Inc.; 2014;448:217–28.
37. Lin TY, Emerman M. Cyclophilin A interacts with diverse lentiviral capsids. *Retrovirology*. 2006;3:1–12.
38. Braaten D, Franke EK, Luban J. Cyclophilin A is required for the replication of group M human immunodeficiency virus type 1 (HIV-1) and simian immunodeficiency virus SIV(CPZ)GAB but not group O HIV-1 or other primate immunodeficiency viruses. *J Virol*. 1996;70:4220–7.
39. Franke EK, Yuan HEH, Luban J. Specific incorporation of cyclophilin a into HIV-1 virions. *Nature*. Nature Publishing Group; 1994;372:359–62.
40. Luban J, Bossolt KL, Franke EK, Kalpana G v., Goff SP. Human immunodeficiency virus type 1 Gag protein binds to cyclophilins A and B. *Cell*. Cell Press; 1993;73:1067–78.
41. Selyutina A, Simons LM, Kirby KA, Bulnes-Ramos A, Hu P, Sarafianos SG, et al. TRIM5α Restriction of HIV-1-N74D Viruses in Lymphocytes Is Caused by a Loss of Cyclophilin A Protection. *Viruses*. MDPI; 2022;14:363.
42. Schmitz C, Marchant D, Neil SJD, Aubin K, Reuter S, Dittmar MT, et al. Lv2, a Novel Postentry Restriction, Is Mediated by both Capsid and Envelope. *J Virol*. American Society for Microbiology; 2004;78:2006–16.
43. Marno KM, Ogunkolade BW, Pade C, Oliveira NM, Sullivan O', Mcknight Á. Novel restriction factor RNA-associated early-stage anti-viral factor (REAF) inhibits human and simian immunodeficiency viruses. *Retrovirology*. 2014;11.
44. Marno KM, O'Sullivan E, Jones CE, Díaz-Delfín J, Pardieu C, Sloan RD, et al. RNA-Associated Early-Stage Antiviral Factor Is a Major Component of Lv2 Restriction. *J Virol*. American Society for Microbiology; 2017;91.
45. Pineda MJ, Orton BR, Overbaugh J. A TRIM5α-independent post-entry restriction to HIV-1 infection of macaque cells that is dependent on the path of entry. *Virology*. 2007;363:310–8.

46. Pizzato M, McCauley SM, Neagu MR, Pertel T, Firrito C, Ziglio S, et al. Lv4 Is a Capsid-Specific Antiviral Activity in Human Blood Cells That Restricts Viruses of the SIVMAC/SIVSM/HIV-2 Lineage Prior to Integration. *PLoS Pathog.* 2015;11:1–29.
47. McCauley SM, Kim K, Nowosielska A, Dauphin A, Yurkovetskiy L, Diehl WE, et al. Intron-containing RNA from the HIV-1 provirus activates type I interferon and inflammatory cytokines. *Nat Commun.* Nature Publishing Group; 2018;9:1–10.
48. Welm BE, Dijkgraaf GJP, Bledau AS, Welm AL, Werb Z. Lentiviral Transduction of Mammary Stem Cells for Analysis of Gene Function during Development and Cancer. *Cell Stem Cell.* Elsevier; 2008;2:90–102.
49. Bartz SR, Vodicka MA. Production of High-Titer Human Immunodeficiency Virus Type 1 Pseudotyped with Vesicular Stomatitis Virus Glycoprotein. *METHODS: A Companion to Methods in Enzymology.* 1997.
50. Kim K, Dauphin A, Komurlu S, McCauley SM, Yurkovetskiy L, Carbone C, et al. Cyclophilin A protects HIV-1 from restriction by human TRIM5α. *Nat Microbiol.* Springer US; 2019;4:2044–51.
51. Sanjana NE, Shalem O, Zhang F. Improved vectors and genome-wide libraries for CRISPR screening. *Nat Methods.* Nature Publishing Group; 2014;11:783–4.
52. Busnadiego I, Kane M, Rihn SJ, Preugschas HF, Hughes J, Blanco-Melo D, et al. Host and Viral Determinants of Mx2 Antiretroviral Activity. *J Virol.* 2014;88:7738–52.
53. Conant D, Hsiao T, Rossi N, Oki J, Maures T, Waite K, et al. Inference of CRISPR Edits from Sanger Trace Data. *CRISPR Journal.* Mary Ann Liebert Inc.; 2022;5:123–30.

## ADDITIONAL FILES

Additional File 1 (Additional File 1.txt). TRIM34 and TRIM5a sequences used in this study, codon-optimized for expression in human cells where applicable.

## COMPETING INTERESTS

The author(s) declare(s) that they have no competing interests.
